1        **Broad frequency sensitivity and complex neural coding in**  
2                    **the larval zebrafish auditory system**

3  
4  
5        Rebecca E. Poulsen<sup>1</sup>, Leandro A. Sholz<sup>1</sup>, Lena Constantin<sup>1</sup>, Itia Favre-Bulle<sup>1,2</sup>, Gilles C.  
6                    Vanwalleghem<sup>\*1</sup>, and Ethan K. Scott<sup>\*1</sup>,

7  
8  
9                    \*Correspondence: [g.vanwalleghem@uq.edu.au](mailto:g.vanwalleghem@uq.edu.au), [ethan.scott@uq.edu.au](mailto:ethan.scott@uq.edu.au)

10  
11        <sup>1</sup>Queensland Brain Institute, The University of Queensland, Brisbane QLD 4072, Australia.

12  
13        <sup>2</sup>School of Mathematics and Physics, The University of Queensland, Brisbane QLD 4072,  
14        Australia.

15  
16  
17  
18        **Keywords:** larval zebrafish, hearing, auditory, brain-wide, auditory processing, sound encoding,  
19        tonotopy, topography, frequency selectivity, acoustic.

20  
21

22 **SUMMARY**

23

24 Most animals have complex auditory systems that identify salient features of the acoustic  
25 landscape to direct appropriate responses. In fish, these features include the volume, frequency,  
26 complexity, and temporal structure of auditory stimuli transmitted through water. Larval fish  
27 have simple brains compared to adults, but swim freely and depend on sophisticated sensory  
28 processing for survival. Zebrafish larvae, an important model for studying brain-wide neural  
29 networks, have thus far been found to possess a rudimentary auditory system, sensitive to a  
30 narrow range of frequencies and without evident sensitivity to auditory features that are salient  
31 and ethologically important to adult fish. Here, we have combined a novel method for delivering  
32 water-borne sounds, a diverse assembly of acoustic stimuli, and whole-brain calcium imaging to  
33 describe the responses of individual auditory neurons across the brains of zebrafish larvae. Our  
34 results reveal responses to frequencies ranging from 100Hz to 4kHz, with evidence of frequency  
35 discrimination from 100Hz to 2.5kHz. Frequency-selective neurons are located in numerous  
36 regions of the brain, and neurons responsive to the same frequency are spatially grouped in some  
37 regions. Using functional clustering, we identified categories of neurons that are selective for  
38 pure tones of a single frequency, white noise, the sharp onset of auditory stimuli, and stimuli  
39 involving a gradual crescendo. These results suggest a more nuanced auditory system than has  
40 previously been described in larval fish and provide insights into how a young animal's auditory  
41 system can both function acutely and serve as the scaffold of a more complex adult system.

## 42 RESULTS AND DISCUSSION

43  
44 The auditory systems of fish are crucial for their survival, informing behaviors that include  
45 escaping from predators, searching for food, and communicating with each other[1-5]. There are  
46 several properties of sound stimuli that allow fish to extract ethologically important information,  
47 and therefore, to mount appropriate behavioral responses. These include the sounds' frequencies,  
48 amplitudes, durations, and whether they are pure tones of a single frequency or complex sounds  
49 composed of multiple frequencies. Various fish species have been shown to respond behaviorally  
50 to a range of different auditory stimulus properties [2, 6-9], and some of the sensory neurons  
51 mediating these behaviors have been characterized electrophysiologically [10-14]. Nonetheless,  
52 our understanding of these auditory networks remains incomplete in terms of the categories of  
53 responsive neurons, their locations and connections, and the ways in which they work together to  
54 process auditory information.

55  
56 Zebrafish larvae, which provide unparalleled opportunities for the description of sensory circuits  
57 and networks [15-18], have thus far been reported to have a rudimentary auditory system [19,  
58 20]. As a result, many of the circuit-level details of complex auditory processing in fish remain  
59 unexplored, and it remains unclear whether the larvae of any fish species extract complex  
60 properties from auditory stimuli to inform behavior [21-23]. In this study, we performed an  
61 analysis of larval zebrafish hearing using whole-brain calcium imaging at cellular resolution  
62 while applying controlled auditory stimuli with a range of amplitudes, frequencies, complexities,  
63 and durations. Because our approach was both comprehensive (spanning the entire brain) and  
64 detailed (resolving individual neurons), it offered the potential to reveal brain-wide auditory  
65 networks in a way that has not previously been possible, as well as shed light on the auditory  
66 capabilities of an aquatic species has during the early stages of development.

67  
68 Our approach required the accurate and reproducible delivery of sound [24], but the air-water  
69 interface complicates this stimulation in aquatic systems, especially in cases where underwater  
70 speakers are impractical. Past studies used different approaches for delivering sound to zebrafish  
71 larvae [7, 25-27], and these larvae have variously been shown to respond behaviorally to  
72 frequencies up to 200Hz [11, 26], 400hz [28], or 1000-1200Hz [7, 25, 29]. The first calcium  
73 imaging study of larval zebrafish hearing, using an air speaker, found strong neural responses in  
74 the 100-400Hz range, with weak responses up to 800Hz [19]. A more recent imaging study,  
75 using an array of underwater speakers, showed responses from 100Hz-450Hz and 950Hz-1kHz,  
76 without finding responses to intermediate frequencies [20].

77  
78 To avoid the complications that arise from the air-water interface and the interference generated  
79 by arrays of speakers, we attached a mini-speaker directly to the back coverslip wall of our 3D  
80 printed imaging chamber, effectively turning the coverslip into a water-coupled speaker (Figure  
81 1A). The fidelity of the resulting stimuli was tested with a hydrophone, confirming the  
82 generation of the target frequencies without appreciable interference or harmonics (Figure S1).

83  
84 Using this approach, we ensonified the chamber with a diverse set of auditory stimuli (Figure  
85 1C), which fell into two basic categories: pure tones of individual frequencies ranging from  
86 100Hz to 4kHz, and white noise stimuli containing frequencies throughout this range. The pure  
87 tones were used to explore frequency selectivity, while white noise stimuli of various amplitudes

88 allowed us to study response sensitivity. These stimuli lasted for 1 second without changes in  
89 frequency or amplitude. We also included white noise amplitude ramps, which were 20 second  
90 stimuli with an amplitude increasing from silence to full volume, and frequency sweeps with  
91 ascending or descending frequencies between 100Hz and 4kHz across a 30 second stimulus.  
92

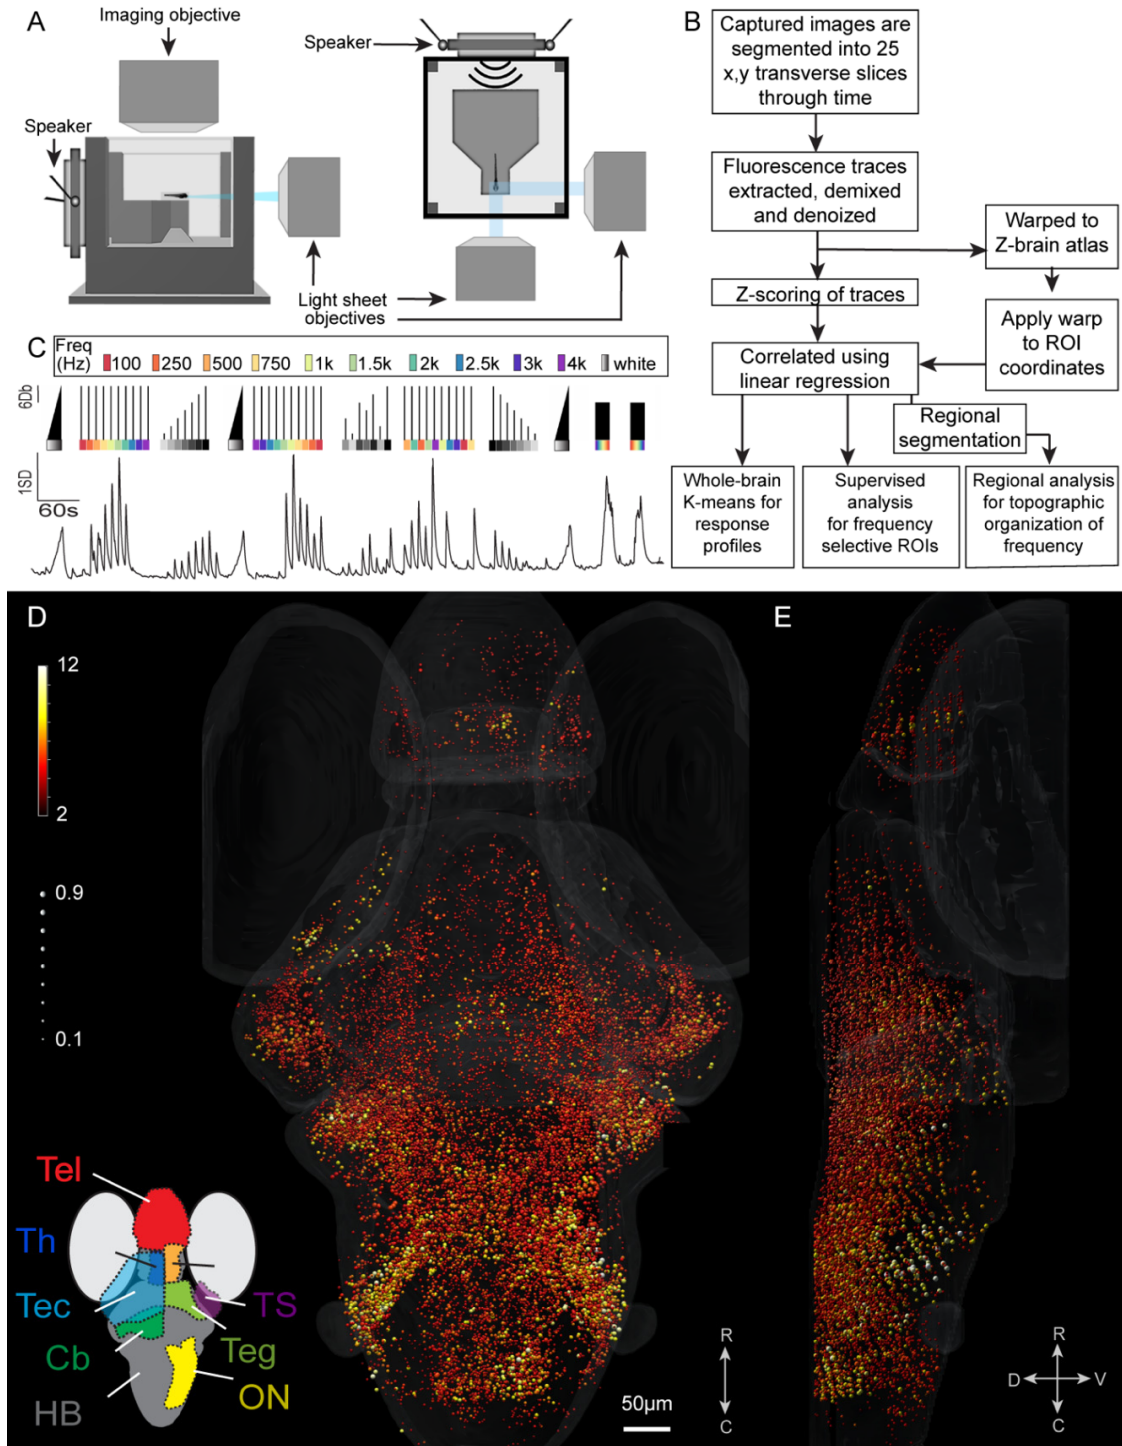

93  
94

95 **Figure 1. Experimental design, analytic workflow, and auditory-responsive ROIs.**

96 (A) Schematic of the imaging and experimental setup used to observe brain activity from zebrafish larvae, showing  
97 the mini-speaker attached to the back coverslip of the chamber. (B) Summary of the analysis workflow used to  
98 identify and categorize auditory neurons across the brain. (C, top) shows a schematic of the stimulus train used,  
99 including stimuli with a range of different forms, frequencies, and amplitudes. (C, bottom) shows the mean  
100 response of all the auditory-responsive ROIs in the resulting dataset. (D and E) All auditory responsive ROIs across  
101 the brain are shown with the strength of the response represented by the color, and the correlation to the linear  
102 regression model ( $r^2$  value) represented as the size of the sphere. The strength of the response is between 2 (the  
103 threshold for inclusion) and 12SD. Brain regions containing a high proportion of auditory-responsive ROIs are  
104 identified spatially (Inset, D). Tel: telencephalon, Th: thalamus, Tec: tectum, TS: torus semicircularis, Teg:  
105 tegmentum, Cb: cerebellum, ON: octavolateralis nucleus, HB: remaining hindbrain. R, rostral; C, caudal; D, dorsal,  
106 V, ventral here and in subsequent figures. Scale bar applies to both D and E.

107  
108 To observe brain-wide responses to these stimuli, we performed volumetric calcium imaging  
109 using dual plane selective plane illumination microscopy (SPIM, Figure 1A) and the *HuC:H2B-*  
110 *GCaMP6s* transgene line [30, 31]. Volumetric images were collected, processed, and analyzed  
111 using the neuroinformatic pipeline outlined in Figure 1B (see Vanwalleghem, et al. [32] and  
112 Methods for details). Briefly, we started by segmenting regions of interest (ROIs) generally  
113 corresponding to individual neurons, and then used linear regression and thresholding to identify  
114 all auditory-responsive ROIs (Figure 1B). The mean signal of these collective ROIs showed  
115 responses to all stimuli in our stimulus train except for pure tones at high frequencies (Fig. 1C).  
116 Using the 3-dimensional positions of each ROI, registered against the Z-brain atlas of the larval  
117 zebrafish brain [33](Figure 1B and Methods), we mapped all responsive ROIs onto a reference  
118 brain, including the strength (regression coefficient) and correlation coefficient of the auditory  
119 responses of each ROI (Figure 1D and E).

120 The resulting map of brain-wide auditory responses revealed ROIs throughout numerous regions  
121 of the brain, including all regions that have previously been described as auditory-responsive in  
122 larval zebrafish zebrafish [19, 20, 34, 35]. Auditory responses were particularly dense and strong  
123 in the octavolateralis nucleus (ON), which receives direct innervation from the ear [36, 37] and  
124 relays auditory information to other regions of the brain [38, 39]. We also observed robust  
125 auditory responsiveness in downstream structures including the torus semicircularis (TS),  
126 remaining hindbrain (HB), thalamus, and cerebellum. Responses were sparser, but nonetheless  
127 clear, in the tectum, telencephalon, tegmentum, and pretectum, with a small number of ROIs in  
128 the habenula. We also used an established method to detect stimulus-associated drops in the  
129 GCaMP signal that are indicative of inhibition ([40], see Methods), but found no consistent  
130 evidence of auditory-responsive neurons that were inhibited.

131 While these results reveal the locations of auditory neurons across the brain, they do not  
132 demonstrate whether different categories of neurons, with selective responses to particular  
133 stimuli, exist within this system. To explore this possibility, we performed k-means clustering  
134 (see Methods) to identify functional categories (clusters) of ROIs responding to individual sound  
135 properties or categories of properties. Using this approach, we found a total of six categories of  
136 response types (clusters). Two of these clusters responded to all the stimuli except for the highest  
137 frequency pure tones (Figure 2A, 2B). The first of these (Figure 2A) showed its strongest  
138 responses to white noise stimuli, including those at a low amplitude. The second broadly tuned  
139 cluster (Figure 2B) was less sensitive to white noise stimuli but showed stronger responses to  
140 pure tones across a range of frequencies. Interestingly, ROIs belonging to these clusters were

141 restricted to the ON, and to a much lesser degree, the TS. Given that the ON, which is  
142 homologous to the cochlear nucleus in mammals, is the first brain structure to receive  
143 information from the ear, this suggests that the early stage of auditory processing in larval  
144 zebrafish predominantly involves broadly tuned neurons, consistent with findings from other fish  
145 species [37, 39]. However, as these clusters' preferences for white noise or pure tones were not  
146 absolute, it is possible that there is a range of broadly responsive ROIs in the ON, and that these  
147 two clusters represent two halves of a diverse continuum of such neurons.

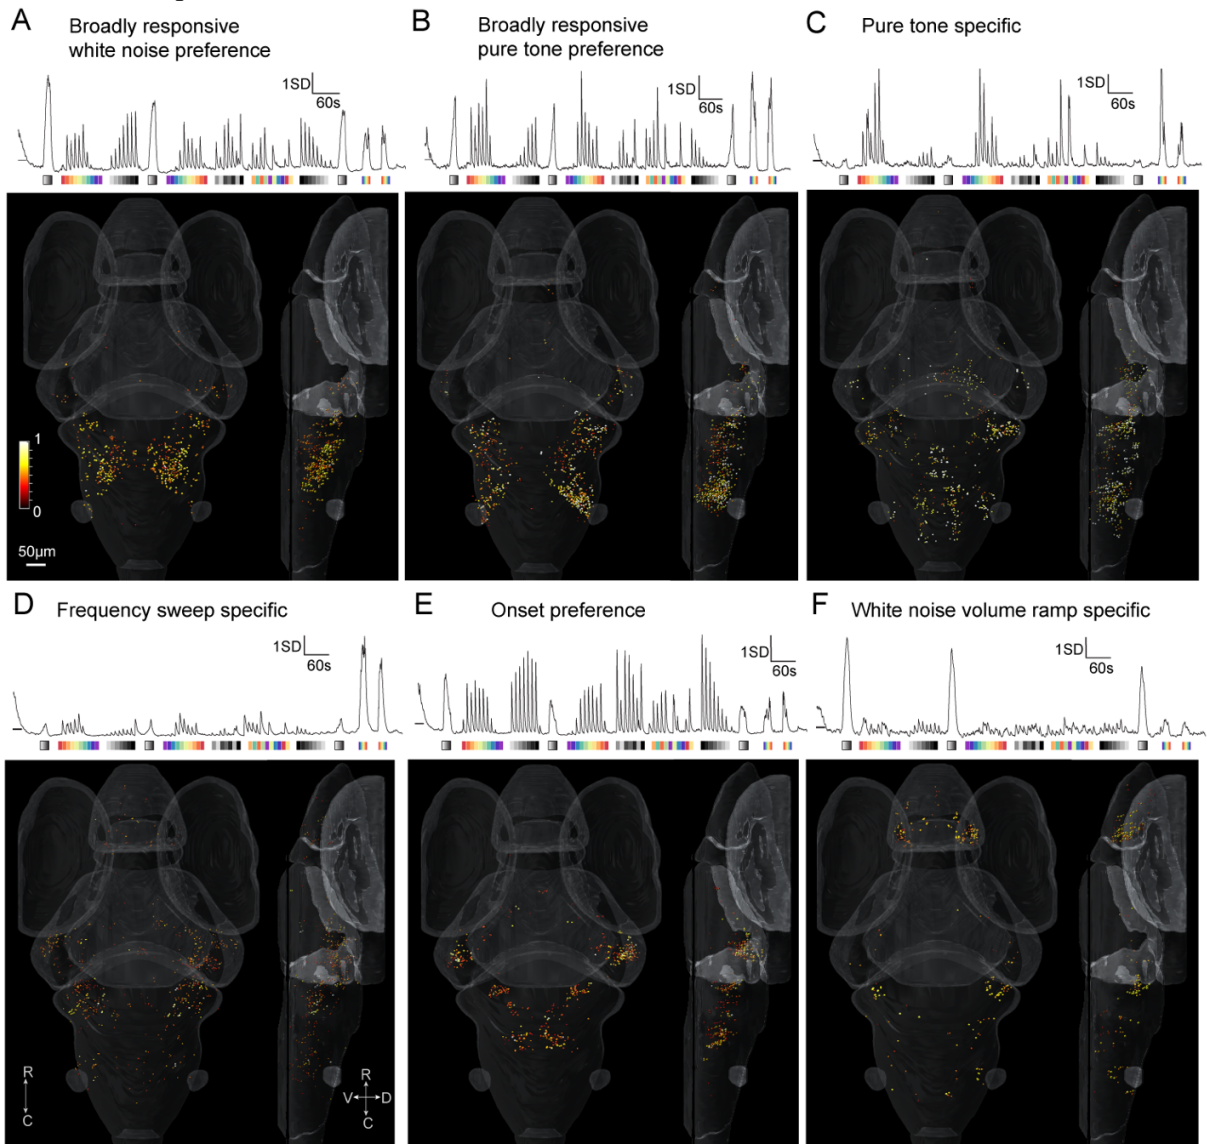

148

149 **Figure 2. K-means clustering of brain-wide auditory responsive ROIs.**

150 K-means clustering revealed 6 clusters of ROIs that respond to particular properties of auditory stimuli. Broadly  
151 tuned clusters were detected (**A**, **B**) that were predominately located in the ON. A pure-tone specific cluster was  
152 present in the medial HB, lateral cerebellum, TS and preteectum (**C**). The fourth cluster was responsive to the  
153 frequency sweeps, with ROIs in the TS, ON and lateral cerebellum (**D**). The fifth cluster represents an onset cluster  
154 present in the TS, the lateral cerebellum and the medial HB (**E**). The final cluster revealed that white noise volume  
155 ramp-selective ROIs are present in the pallial region of the telencephalon, the lateral cerebellum and sparsely in the  
156 HB (**F**). Scale bar applies to all panels.

157

158 A third functional cluster included ROIs that responded almost exclusively to pure tones across a  
159 range of frequencies (Figure 2C). These ROIs were distributed across the ON, TS, HB, and  
160 tegmentum. This distribution closely resembles that of the fourth cluster (found in the ON, TS,  
161 tectum and remaining HB and sparsely in the thalamus and telencephalon, Figure 2D), in which  
162 the ROIs were specifically responsive to frequency sweeps. These clusters have responses to  
163 pure tones in common, whether those tones occurred in isolation (Figure 2C) or at different times  
164 during a frequency sweep (Figure 2D), suggesting that the auditory ROIs in these regions are  
165 involved in the detection of pure tones, and potentially the discrimination of different  
166 frequencies.

167

168 A fifth cluster contained ROIs that responded strongly to stimuli with sudden onsets (square  
169 tones), including both pure tones and white noise stimuli and stimuli with very low amplitudes.  
170 In contrast, they had relatively weak responses to auditory ramps, even once these ramps reached  
171 their peak amplitudes (Figure 2E). We interpret these to be “onset” ROIs that are specifically  
172 sensitive to the sudden occurrence of sound. These ROIs were particularly abundant in the TS,  
173 and were also present in the ON, and to a lesser degree, the thalamus. This cluster indicates that  
174 the larval zebrafish TS is particularly sensitive to the onset of a sound, spanning from the lowest  
175 frequency played (100Hz), through to 3kHz, and to all white noise volumes. A reciprocal cluster  
176 (Figure 2F) responded almost exclusively to white noise ramp stimuli, with little or no response  
177 to stimuli with sharp onsets. This cluster’s distribution was distinct from those of the other five  
178 clusters, with ROIs predominantly restricted to the lateral pallium and lateral cerebellum. Taken  
179 together, these findings indicate that larval zebrafish have neurons selective to a range of specific  
180 properties of sound by 6dpf.

181

182 The application of a clustering approach with our brain-wide imaging data provides a framework  
183 for understanding more nuanced auditory processing than has previously been described in any  
184 larval fish species. The identification of these diverse and specialized auditory neurons, with  
185 selective responses to pure versus complex tones, and to the onset of square tones versus ramps,  
186 suggests that some of the sophistication of the adult fish auditory system [3, 24, 37, 38, 41, 42] is  
187 already in place in zebrafish larvae at 6 dpf. There are also hints that the structure of this adult  
188 pathway is present, in a nascent form, in these larvae. Our results reveal that broadly responsive  
189 auditory neurons are concentrated in the ON, at the early stages of auditory processing, whereas  
190 neurons with more specialized responses are likely to be located downstream of the ON in the  
191 TS, or in a variety of brain structures located later in the auditory processing pathway. Even  
192 within brain regions, we found examples of spatial segregation of neurons with distinct response  
193 profiles. These include the separate regions of the ON occupied by neurons with preferences for  
194 white noise and pure tones (Figure 2A, B) and distinct distributions in the hindbrain for neurons  
195 responding to pure tones, onset stimulus, and white noise ramps (Figure 2C, E, and F). These  
196 distinct spatial distributions are difficult to interpret in larvae, where these structures have not yet  
197 nucleated, but they nonetheless suggest spatially heterogeneous encoding of the individual  
198 components of sound, likely representing the precursors of the mature auditory system.

199

200 Notably, we observed ROIs that were responsive to pure tones, raising the possibility of  
201 frequency discrimination in larval zebrafish. Adult zebrafish have been shown to discriminate  
202 different frequencies in behavioral experiments [43], but it is less clear whether such

203 discrimination takes place in any larval fish (zebrafish or other species). Our previous work has  
204 suggested that there is little or no frequency discrimination among ON neurons in larval  
205 zebrafish [19], although a recent study from Privat, et al. [20] proposed distinct neural pathways  
206 for broad bands of high and low frequency sounds at the whole-brain level. Overall, the larval  
207 zebrafish literature suggests a detection range up to roughly 1kHz, with, at best, coarse frequency  
208 discrimination across this range [7, 25, 29]. Having identified a large population of ROIs across  
209 the brain that respond to pure tones (Figure 2), we next explored whether their responses provide  
210 evidence for frequency discrimination or the topographic representation of different frequencies  
211 across or within brain regions.

212  
213 To conduct this analysis, we adopted a supervised approach, building regressors for each  
214 frequency of pure tone in our stimulus train. We then defined an ROI as frequency selective if its  
215 regression coefficient (response strength) was greater than 2.5SD above the mean distribution for  
216 that frequency, and below 2.0SD for all other frequencies (see Methods). Applying these criteria  
217 to 35,720 auditory-responsive ROIs across seven larvae, we identified 9,411 ROIs that were  
218 frequency selective, including ROIs selective to each of our 10 frequencies ranging from 100Hz  
219 to 4kHz (Figure 3A). The average traces of neurons selective to each frequency peaked much  
220 higher (>two-fold) than adjacent frequencies through the low-mid frequency range (up to 2kHz)  
221 (Figure 3A). In contrast, those for 2.5k, 3k, and 4.0kHz-responsive ROIs were similar to the  
222 adjacent frequencies (Figure 3A). This suggests that larval zebrafish may be sensitive to these  
223 higher 2.5-4kHz frequencies without being able to discriminate among them, whereas for the  
224 lower frequencies, discrimination appears likely. We then visualized the frequency-selective ROI  
225 locations throughout the brain (Figure 3B, C). Although we found most of the ROIs spanned the  
226 rostral-caudal extent of the brain, the most responsive ROIs were located in the hindbrain,  
227 including the ON. This was especially true for ROIs that were selective to the mid frequencies  
228 (750Hz-2000Hz). The low (100Hz) and high (2.5-4.0kHz) frequencies were more broadly  
229 dispersed along the rostral-caudal axis, including notable concentrations of ROIs in the  
230 telencephalon (Figure 3D). For frequencies above 2.5kHz, these responses tended to involve the  
231 lateral telencephalon, where ROIs responsive to lower frequencies were concentrated in the  
232 medial telencephalon (Figure 3B).

233



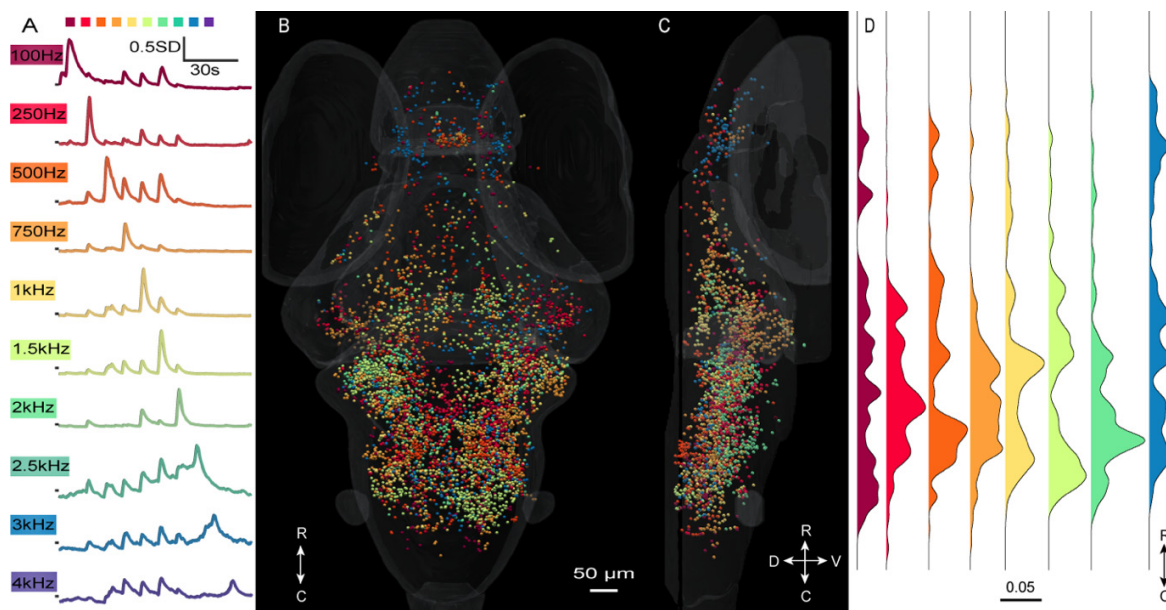

234  
235  
236  
237  
238  
239  
240  
241  
242

### Figure 3. Frequency specificity and homogeneity at the whole-brain level

(A) shows the mean responses of all ROIs selectively responding to each frequency in our stimulus train (top), and (B) shows their positions in the brain from a dorsal view, and (C) shows a lateral view. Scale bar applies to both B and C. (D) Using a one-dimensional kernel density estimation (KDE) computation, we looked at the density of frequency-selective ROIs at the whole-brain level, from rostral to caudal. Whole-brain images such as those in (B) can be seen for individual frequencies in Supplementary Figure 2.

243  
244  
245  
246  
247  
248  
249  
250  
251  
252  
253  
254  
255

In mammals and some adult fish, auditory responses are organized tonotopically, whereby the frequency specificities of the neurons correlate with their spatial positions [38, 42, 44-46]. In larval zebrafish, one study has hinted at tonotopy, albeit inconclusively [19], whereas another has suggested broad brain-wide segregation of high and low frequency responses without responses to intermediate frequencies [20]. To search for topographical encoding of frequency in our dataset, we carried out a spatial analysis of frequency selective ROIs in ten brain regions that were prominent in our brain-wide dataset or which are known to be involved in auditory processing [19, 20, 34, 35, 39]. These regions were the ON, TS, thalamus, pretectum, tectum, habenula, tegmentum, telencephalon, cerebellum, and remaining HB. Collectively, these regions include more than 80% of the ROIs that we segmented across the brain, and more than 97% of frequency-responsive ROIs in our dataset. Because of the overlapping responses and similar spatial distributions of ROIs responding to 2.5k, 3k, and 4 kHz tones (Figure 3), we combined these into a single category for this analysis.

256  
257  
258  
259  
260  
261  
262  
263  
264  
265

The broad frequency tuning of each brain region can be gauged by comparing the abundance of the frequency specificities of its ROIs to those of ROIs across the entire brain (Figure 4A). The most striking departures from brain-wide averages were found in the telencephalon, and to a lesser degree in the habenula, both of which were enriched for responses to high frequencies (Figure 3B). The thalamus was notable for lacking responses to both high and low frequencies, responding instead to frequencies from 500Hz to 2kHz. Other brain regions exhibited frequency-responsive ROIs whose relative proportions approximately reflected those across the brain as a whole.

266 To search for topography in each of these brain regions, we next performed a k-nearest neighbor  
267 (kNN) analysis whereby, for each ROI selective to a given frequency, we observed a selected  
268 number ( $k$ ) of nearest neighbors, and recorded the frequency selectivity of those neighbors (see  
269 Methods). The results of this nearest neighbor analysis were then compared to a randomized  
270 dataset where the same number of ROIs of each frequency was retained, but the frequency  
271 selectivities of these ROIs were reassigned randomly. We performed 100 iterations of this  
272 randomization, and compared the neighbors yielded from these random datasets to those seen in  
273 our actual imaging dataset (Figure 4). The rationale for this approach was that heterogeneous  
274 distributions of frequency-selective neurons, where neurons responding to a particular frequency  
275 are spatially clustered, should result in a higher prevalence of same-frequency neighbors in our  
276 experimental dataset versus the randomized datasets. Further, if frequency responsiveness is  
277 spatially organized in a tonotopic map, ROIs responding to adjacent frequencies should be  
278 overrepresented among the neighbors in the experimental versus the random dataset.

279  
280 Each brain region had its own profile of frequency-responsive ROIs (Figure 4A), and in each  
281 brain region, the randomized nearest neighbor population closely reflected this overall  
282 abundance of each frequency (Figure 4B-H, “all random” bar,  $k$  neighbors listed in Methods).  
283 This provided assurance that our randomization was working. We could identify spatial  
284 clustering of the ROIs of each frequency by looking for cases where the same frequency was  
285 overrepresented among its neighbors (dark boxes in each bar), as compared to neighbors from  
286 the “all randomized” bar. To quantify these effects, we generated a “neighbor frequency index”  
287 (see Methods). This gives positive values (shown in blue, Figure 4B-G) when a given frequency  
288 is overrepresented among the neighbors and negative values (red) when that frequency is  
289 underrepresented. Accordingly, spatial clustering of ROIs with the same frequency sensitivity  
290 should be represented by positive values along the diagonal of each matrix (bottom right, Figure  
291 4B-G), and tonotopy would drive positive values in squares adjacent to the diagonal.

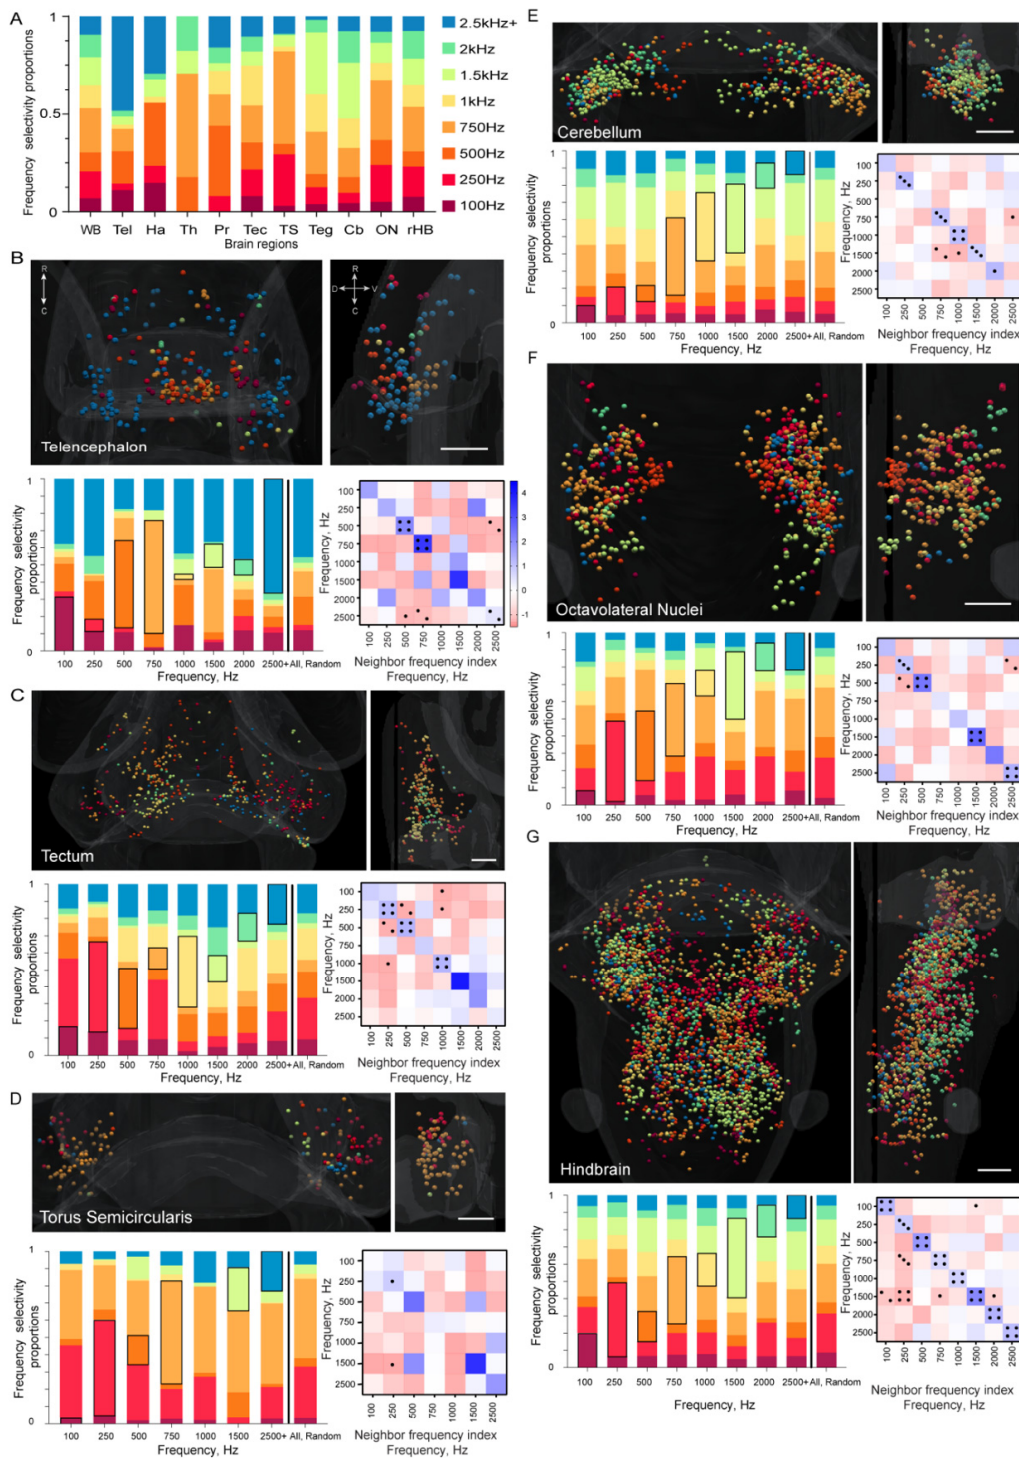

293 **Figure 4 – Regional frequency distribution and tonotopy** – (A) shows the fraction of ROIs per frequency at the  
294 whole-brain (WB) and regional levels. For (B-G), the spatial distribution of ROIs from the dorsal (**top left**) and  
295 lateral (**top right**) views are shown. Bar graphs (**bottom left, B-G**) show the proportions of nearest neighbors for  
296 ROIs of a given frequency preference (separate bars for ROIs responding to different frequencies), with same-  
297 frequency neighbors indicated by a black box. For comparison, data from the spatially randomized dataset are  
298 shown in the last bar. Matrices (**bottom right**) of the neighbor frequency index show pairs of frequencies that are  
299 overrepresented (**blue, bar in B**) or underrepresented (**red**) as neighbors. Significant results versus the randomized  
300 dataset are indicated (P value: • <0.05, •• <0.01, ••• <0.001, •••• <0.0001). Kruskal-Wallis tests with Dunn’s  
301 correction for multiple comparisons were performed to establish P-values. The k-nearest neighbor heat map legend  
302 is shown in (B) and applies to panels (B-G). The same information for the remaining brain regions can be found in  
303 Supplementary Figure 3 and all P-values are presented in Supplementary Figure 4.  
304

305 In the thalamus, the pretectum, and the habenula, there were not enough ROIs to support a  
306 statistical analysis of their spatial distribution (these distributions are shown in Supplementary  
307 Figure 3). In the tegmentum, there were no statistically significant departures from a  
308 homogeneous distribution of ROIs responding to different frequencies, suggesting a lack of  
309 spatial frequency representation (Supplementary Figure 3). Within the telencephalon, tectum,  
310 TS, cerebellum, ON, and HB, however, there were pronounced relationships between the spatial  
311 distributions of ROIs and their frequency preferences (Fig 4B-G).  
312

313 Using our kNN analysis, we found numerous cases in which same-frequency ROIs were spatially  
314 clustered in other auditory brain regions (Figure 4B-G). In most regions, there were examples of  
315 significantly elevated neighbor frequency indices for ROIs responding to the same frequency  
316 (blue diagonal lines, Figure 4B-G), with these being particularly prominent in the tectum,  
317 cerebellum, ON, and hindbrain, where all same-frequency indices were elevated, many of them  
318 significantly. This was not consistently the case in the TS, where the very high abundance of 250  
319 and 750Hz-responsive ROIs may have limited the sensitivity of the frequency neighbor index.  
320 The telencephalon is notable for its segregation of high and low frequency ROIs. Low frequency  
321 responses are abundant in the medial telencephalon, which is homologous to the amygdala in  
322 mammals [47, 48], whereas high frequency responses are concentrated in the lateral  
323 telencephalon, which corresponds to the mammalian hippocampus [49, 50].  
324

325 Although our nearest neighbor analysis identified numerous examples of spatially clustered  
326 same-frequency ROIs, it provided scant evidence for tonotopy, in which responses to similar  
327 frequencies would be spatially adjacent. The distributions of ROIs in the primary auditory  
328 region, the ON (Figure 4F), appeared to have the lower frequencies spatially organized in the  
329 dorsomedial section, with the populations representing the higher frequencies being located more  
330 caudally. The tectum (Figure 4C) also appeared to contain a medial (high frequency) to lateral  
331 (low frequency) gradient, while the HB (Figures 3D and 4G) appeared to have a rostral (low  
332 frequency) to caudal (middle frequency) gradient. None of these trends, however, was confirmed  
333 by consistently elevated frequency neighbor indices for consecutive frequencies, which would  
334 have appeared as significantly blue cells adjacent to the diagonals in Figure 4. Such tonotopy is a  
335 hallmark of the mammalian cochlear ganglion [44, 51, 52], and is also present in the ON and TS  
336 in the adults of other teleost fish species [38, 42, 53, 54], but our results suggest that this tonotopy  
337 is not present in zebrafish at 6dpf. One possibility is that tonotopy may develop at later stages of  
338 development in zebrafish. Another possibility is that zebrafish may have no tonotopic  
339 organization for sound frequencies, perhaps because spatial organization is dependent on the  
340 cochlea, which is absent in teleosts.

341  
342 Overall, the observations from our nearest neighbor analysis suggest that, while neurons  
343 responding to a given frequency are spatially clustered at multiple stages of the auditory  
344 processing pathway in larval zebrafish, systematic tonotopy is absent or still in a rudimentary  
345 form. Details of our approach and statistical tests mean that these represent conservative  
346 interpretations. We observed several cases where strong positive neighbor frequency index  
347 scores proved to be non-significant. These generally occurred where the brain region as a whole  
348 (the TS, for instance) or the frequency being tested (1500Hz in the tectum, for example) had a  
349 small number of ROIs. It is likely that larger datasets would reveal significance in these  
350 relationships, as they did in the HB (Figure 4G) where a large number of ROIs show significance  
351 in all same-frequency comparisons. We also note that our cases of strong same-frequency  
352 clustering may be masking tonotopy, given that a high abundance of same-frequency ROIs in a  
353 neighbor pool depletes the pool for other frequencies, including adjacent ones. This may provide  
354 a partial explanation for the lack of significant tonotopy in our analyses, although it is also  
355 possible that this tonotopy simply does not exist in zebrafish larvae.

356  
357 These results differ in important ways from two past studies of brain-wide auditory processing in  
358 larval zebrafish. One of these, from our own group [19], showed a limited frequency response  
359 range (from 100-400Hz), and fewer responsive brain regions. In large part, this is likely due to a  
360 stimulus train that was limited to a 100-800Hz range, and that comprised only pure tone bursts.  
361 Furthermore, we used an air-coupled speaker in these past experiments, raising the likelihood  
362 that the air-water interface interfered with the delivery of our auditory stimuli. Finally, this study  
363 was done on a more primitive light-sheet microscope, which likely limited our detection of weak  
364 signals and deeper brain regions.

365  
366 A recent study by Privat, et al. [20] showed two regions of frequency sensitivity, ranging from  
367 150-450Hz and 950Hz-1kHz (the highest frequency tested), which were represented primarily in  
368 the hindbrain and midbrain, respectively. No responses were observed to frequencies between  
369 these ranges. Their use of geometric ROIs presumed to encompass numerous neurons could  
370 explain the absence of intermediate frequencies from their study, consistent with the fact that we  
371 often found our 500Hz- and 750Hz-responsive neurons intercalated with ROIs responding to  
372 other frequencies. Furthermore, they used a cytoplasmically-targeted GCaMP, providing the  
373 benefit that they could analyze responses in neuropil region (which our nuclear-targeted GCaMP  
374 did not reveal), but at the cost of resolving individual neurons. Finally, their study targeted  
375 particular parts of the brain for imaging and may therefore have missed responses that we have  
376 found in regions not previously associated with auditory processing in this system.

377  
378 Previous studies have described the auditory sensitivity and hearing range of larval zebrafish  
379 using a range of different approaches [5, 7, 19, 20, 25], generally describing a system with  
380 limited sensitivity to stimulus components, a tight frequency range, and little spatial  
381 specialization in auditory coding. In this study, we have used a more diverse stimulus train, a  
382 novel method for sound delivery, and an upgraded imaging system to detect and characterize the  
383 brain-wide responses of individual neurons in larval zebrafish. We have revealed response  
384 characteristics that suggest broad auditory tuning in the early stages of the network, especially in  
385 the ON, and sensitivity to more nuanced stimulus properties in later stages, including in the TS,  
386 telencephalon, cerebellum, and remaining HB. These later steps may provide sensitivity to pure

387 tones, the detection of the onset of auditory stimuli, and the detection of stimuli that ascend in  
388 intensity gradually. We have also shown broader frequency sensitivity, up to 4kHz, than has  
389 previously been observed, and spatial clustering of frequency-selective neurons in several brain  
390 regions, although does not reflect coherent patterns of tonotopy.

391  
392 These results provide evidence for more sophisticated auditory processing than has previously  
393 been appreciated in this model system and offers a starting point from which to use its strengths  
394 in relation to imaging and optogenetics to characterize the circuits and networks composing the  
395 auditory system as a whole.

396

### 397 **Acknowledgements**

398 We thank the University of Queensland's Biological Resources aquatics team for animal care.

399 We also thank Emmanuel Marquez-Legorreta for his intellectual expertise regarding  
400 telencephalic activity. We thank Germán Sumbre and Rowan Tweedale for suggestions on the  
401 manuscript. Support was provided by an NHMRC Project Grant (APP1066887), a Simons  
402 Foundation Pilot Award (399432), a Simons Foundation Research Award (625793), and two  
403 ARC Discovery Project Grants (DP140102036 & DP110103612) to E.K.S.; an EMBO Long-  
404 Term Fellowship to G.C.V.; a fellowship from the Human Frontier Science Program  
405 (LT000146/2016) to M.A.T.; and University of Queensland Postgraduate Awards to R.E.P and  
406 L.S..

407

### 408 **Author Contributions**

409 Conceptualization, E.K.S.; Methodology, R.E.P., G.C.V., I.A.F-B and L.S.; Investigation, R.E.P.,  
410 G.C.V.; Animal Colony Maintenance, L.C.; Formal Analysis, R.E.P., G.C.V. and L.S.; Data  
411 Curation, R.E.P, G.C.V.; Writing—Original Draft, R.P. and E.K.S.; Writing—Review and Editing,  
412 G.C.V., L.S., L.C. and I.A.F-B.; Figure Construction, R.E.P. and L.S.; Funding Acquisition,  
413 E.K.S.; Resources, E.K.S.; Supervision, E.K.S. and L.C.

414

### 415 **Data Availability**

416 The dataset generated and analyzed for this study can be found in the UQ eSpace  
417 <https://doi.org/10.14264/680dfce>, and the code used in the analysis can be found at  
418 [https://github.com/Scott-Lab-QBI/Brainwide\\_auditory\\_processing](https://github.com/Scott-Lab-QBI/Brainwide_auditory_processing).

419

### 420 **Competing Interests statement**

421 The authors declare no competing interests.

422

## 423 METHODS

424

### 425 Animals

426

427 Adult zebrafish (*Danio rerio*) were maintained at 28.5°C at a density of 10-15 fish per liter and  
428 on a 14/10 hour light/dark cycle. The *HuC:H2B-Gcamp6s* transgenic line was used for these  
429 experiments, targeting the calcium indicator GCaMP6s to the nuclei of all neurons[30].

430 Fertilized eggs of the TLN strain were transferred into E3 medium (distilled water with 10%  
431 Hanks solution, consisting of 137mM NaCl, 5.4mM KCl, 0.25mM Na<sub>2</sub>HPO<sub>4</sub>, 0.44mM KH<sub>2</sub>PO<sub>4</sub>,  
432 1.3mM CaCl<sub>2</sub>, 1.0mM 654 MgSO<sub>4</sub> and 4.2mM NaHCO<sub>3</sub> at pH 7.2) and kept at 28.5°C in an  
433 incubator with a 14/10 hour light/dark cycle. Zebrafish housing, breeding, larval maintenance,  
434 and experiments were performed with approval from the University of Queensland Animal  
435 Ethics Committee (IMB/237/16/BREED and SBMS/378/16).

436

### 437 Calcium imaging

438 6dpf larval zebrafish were set in a 2% low melting point agarose (Progen Biosciences), dorsal  
439 side up, and placed it into the custom-made chamber [35]. The 3D printed 24x24mm chamber  
440 consists of a square plastic base and a 0.2mm<sup>2</sup> post in each corner. 20mm x 20mm glass  
441 coverslips (ProSciTech) were fixed on to each side using a waterproof glue (Liquid Fusion Clear  
442 Urethane Adhesive). The glass coverslips enabled light-sheet illumination from the front and one  
443 side of the animal with minimal light distortions. Audio stimuli were delivered from the speaker  
444 adhered to the rear coverslip. Agarose-set fish were mounted onto the platform of the chamber  
445 with additional agarose to prevent the fish from moving throughout the experiment. Once the  
446 agarose had set, the chamber was filled with E3 medium and allowed to sit for a minimum of 30  
447 minutes to minimize drifting of the fish during imaging.

448

449 Whole-brain calcium fluorescence imaging was done using a custom-built selective plane  
450 illumination microscope (SPIM) to determine the neural responses *in vivo* while the auditory  
451 stimuli were presented [31, 55]. The fish was simultaneously illuminated with two planes from  
452 the front and one side and imaged at 10µm increments in the dorsoventral axis with an exposure  
453 time of 10ms. This produced a 25-slice volumetric representation of the entire brain, with a 4Hz  
454 volumetric imaging rate. Details of this microscope and imaging procedure have been described  
455 previously [17, 31].

456

### 457 Auditory stimulation

458 Auditory stimulation was provided by a mini speaker (Dayton Audio DAEX-9-4SM Skinny Mini  
459 Exciter Audio, Haptic Item Number 295-256) fixed to the back glass surface (caudal to the  
460 animal) of the imaging chamber and wired to an amplifier (Dayton Audio DA30 2 x 15W Class  
461 D Bridgeable Mini Amplifier). Preliminary testing was done to determine the optimal speaker  
462 capabilities (data not shown). The sound pressure level (SPL) reading was taken before each  
463 experiment in each chamber. Sound level measurements of the white noise at a playback volume  
464 of 0dB digital full scale (FS) were taken at the position of the fish before filling the chamber and  
465 measured approximately 84dB (SPL) noting the background noise was 40-45dB (SPL). A  
466 measurement of 74-76dB (SPL) was taken at the surface of the liquid when the chamber  
467 contained E3 medium. This ensured consistency between chambers and between experiments.

468

469 Stimulus playback and image acquisition were performed using Micro Manager software [17,  
470 56]. Each presentation of the stimulus train included a 20 second white noise amplitude ramp, 1  
471 second of 10 frequencies with a 2ms rise and fall time (100, 250, 500, 750, 1000, 1500, 2000,  
472 2500, 3000, 4000Hz) at 0dBFS with 9-second inter-stimulus intervals (ISIs), and one second  
473 white noise with a 2ms rise and fall time at 7 amplitudes ranging from -18dBFS to 0dBFS in 3dB  
474 increments with a 9-second ISI. This train was presented 3 times, changing the order of the type  
475 of stimulus, and using ascending, descending and quasi-random orders of frequencies, and  
476 ascending, quasi-random and descending orders of amplitudes. There was 30-second rest  
477 between each stimulus type and stimulus presentation.

478  
479 To test the frequency response of the speaker, a custom-built hydrophone (Neptune Sonar, UK)  
480 was used to take spectral analysis recordings of the white noise and individual frequencies while  
481 the chamber contained E3 medium, and without the fish present. The recording was done by  
482 placing the microphone in the water-filled chamber. This was then connected to an Edirol FA-66  
483 microphone preamplifier audio interface (Roland, Japan) and recorded into a professional audio  
484 program (Ableton Live!, Germany). The spectral analysis was performed using a Fast Fourier  
485 Transform plugin SPAN (Voxengo, Sweden) and showed the white noise response at lower  
486 frequencies attenuating at 150Hz, and high frequencies beginning to attenuate at 6kHz. The  
487 recordings also delineated one of the limitations of the speaker delivery system design. There  
488 was a comparably low frequency response at 100Hz in the white noise and individual frequency  
489 recordings. The individual pure tones contained minimal harmonic distortion. The frequency  
490 showing the most secondary harmonics was 250Hz. This was approximately 21dB below the  
491 fundamental, meaning that the fundamental was over three times the amplitude of any harmonic  
492 across all frequencies, which was at or below the hearing threshold of the fish [35]. Secondary  
493 harmonics for other frequencies were all more than 40dB below the fundamental. During the  
494 experiments, the chamber was fastened to the platform to minimize any sonic or motion artefacts  
495 that might have resulted from vibrations.

496

### 497 **Data processing and analysis**

498 We excluded three fish because the imaging quality was blurry, or the fish were tilted. Of the  
499 remaining ten fish, once the images were captured, videos were cropped, the transverse slices  
500 were segmented to identify ROIs corresponding to individual neurons, and the data were resaved  
501 as 25 individual Z-stacks per experiment over time, using Image J v1.52c. Each of the 25 planes  
502 was then motion corrected using the NoRMCorre algorithm [57]. Fluorescent traces generated by  
503 calcium transients in each ROI were then extracted, demixed, and denoised using the CaImAn  
504 package previously described [17, 19, 57]. These traces were then z-scored, and correlated using  
505 linear regression, which was built from the stimulus train.

506

507 MATLAB v9.5 (Mathworks) was used to further analyze the data. Linear regression was used to  
508 extract the auditory-responsive ROIs, and a regressor was built for each of the stimulus types:  
509 white noise ramps, individual pure tone sine waves, short white noise volumes, and frequency  
510 sweeps. This gives an indication of baseline and stimulus-driven activity and identified neurons  
511 that respond to the stimulus train. The motion-corrected 3D volumes were registered, using  
512 Advanced Normalization Tools (ANTs, <https://github.com/ANTsX/ANTs>), to the H2B-RFP  
513 reference of Zbrain [33, 58]. The resulting warps were then applied to the centroid positions of  
514 the ROIs, which allowed us to use their location within brain regions outlined by Zbrain to



515 conduct region-specific analysis [32]. Three additional fish did not successfully warp to Zbrain  
516 and were excluded at this point, leaving an  $n=7$ .

517  
518 Response types to the properties of sound were then categorized at a brain-wide level. We looked  
519 at the correlation coefficient of the fluorescence traces to each auditory stimulus type (10 pure  
520 tones, white noise volumes, frequency sweep for both increasing and decreasing frequency  
521 order), thresholding at an  $r^2$  value of 0.1 and a regressor coefficient (response strength) threshold  
522 of 2.0 SD above the mean response. K-means clustering was then used as part of the analysis to  
523 look at brain-wide profile response types. Given that k-means forces every ROI into a cluster, we  
524 used an additional filter of an  $r^2$  value of 0.5, when compared to the mean of that cluster to  
525 further clean up the data and remove ROIs that did not match the cluster. The analysis returned  
526 15 clusters. From this, 3 non-auditory clusters, 4 clusters that were under-represented in more  
527 than half the fish and 2 noisy clusters were excluded, with the remaining 6 clusters were kept.

528  
529 To look for frequency heterogeneity, a supervised conditional analysis was conducted to  
530 determine whether any of the ROIs were responsive to an individual frequency. For an ROI to be  
531 characterized as being frequency specific, its response must be 2.5SD above the mean response  
532 strength for that particular frequency and its response must be less than 2SD above the mean  
533 response strength at all other frequencies. We looked at responses at thresholds from 1.0 SD to  
534 3.0 SD and determined that 2.5 SD provided the most accurate representation of the data, as 1SD  
535 left too many noisy responses, and 3.0 SD left very few ROIs passing threshold. We first looked  
536 at this across the brain and subsequently in all the auditory regions to determine if there were  
537 whole-brain [20] or regional [19] spatial representations of frequency. Regionally, we looked at  
538 areas previously indicated to be responsive to sensory processing, namely, the ON, TS, thalamus,  
539 telencephalon, cerebellum, tectum, tegmentum, habenula and HB. We also used the inverse  
540 criteria to look for potential ROIs whose response would be inhibited at a specific frequency  
541 (response had to be 2.5SD below the mean response strength to a particular frequency), but  
542 identified no inhibited ROIs [40].

543

#### 544 **Data visualization**

545 To give a visual representation of the data, clusters were mapped back onto the brain using  
546 Unity™ which has been adapted into a data visualization system. An isosurface mesh of the  
547 zebrafish brain was generated from the Zbrain masks for the diencephalon, mesencephalon,  
548 rhombencephalon, telencephalon and eyes using ImageVis3D [17, 18]. The mesh was imported  
549 in Unity and overlaid to the ROIs. Each ROI was represented as a sphere within the brain. This  
550 enabled a 3D visualization of the resulting clusters and provided a qualitative way to determine if  
551 there were any spatially significant results.

552

#### 553 **Statistical analysis**

554 To quantify spatial frequency heterogeneity at a brain-wide and regional level, a multi-  
555 dimensional density estimation was done to determine how the individual frequencies were  
556 arranged spatially at a whole-brain level (Figure 3D). This calculated the density of each  
557 frequency on the rostral-caudal axis. In order to characterize whether the frequency-selective  
558 ROIs showed any kind of spatial segregation, a k-Nearest Neighbor (kNN) analysis was carried  
559 out. This was done brain-wide and regionally. All code related to these computations is available  
560 in [https://github.com/Scott-Lab-QBI/Brainwide\\_auditory\\_processing](https://github.com/Scott-Lab-QBI/Brainwide_auditory_processing).

561  
562 The spatial position of each group of frequency-selective ROIs was used as input to a 1D (Figure  
563 3D) kernel density estimation (KDE) computation. The `sklearn.neighbors.KernelDensity` method  
564 from python's `scikit-learn` module was used for this purpose. To compute the KDE, a Gaussian  
565 kernel was used and the optimal bandwidth was found through optimization of the log  
566 probability density under the KDE model with the `sklearn.model_selection.GridSearchCV`  
567 method. The range of bandwidth values was chosen to ensure that it covered three orders of  
568 magnitude up to a third of the maximum range of values in the dimension where the KDE was  
569 computed (e.g. if values in the rostro-caudal axis had a range of 1000 pixels, the range of  
570 bandwidths tested was from 3 to 300 pixels). For the brain-wide density plots in Figure 3D, the  
571 bandwidth was defined as a weighted average of the optimal bandwidths found for each  
572 frequency.

573  
574 The characterization of topographic organization of frequency selective ROIs was performed  
575 through the kNN analysis. The kNN classifier receives a set of data points (the  $xyz$  coordinates of  
576 the ROIs in this case) and labels (the frequency for which the ROI is selective) and a parameter  $k$   
577 and outputs a decision boundary in the  $xyz$  space that defines the most likely label for an ROI  
578 with those particular coordinates based on the labels of its  $k$  neighbors. In cases where a brain  
579 region contained a sufficient number of ROIs for each frequency (minimum of 4) in the right  
580 lateral area, only the ROIs that side were used. However, in two of the regions, the telencephalon  
581 and tegmentum, the ROIs located in the left lateral area were translated to be merged to the other  
582 area based on the detected midline (coordinate origin value of the medial-lateral axis,  $y = 315$   
583 pixels), with the merged set of points being used as the input.

584  
585 The `sklearn.neighbors.KNeighborsClassifier` method was used together with  
586 `sklearn.model_selection.cross_val_score` in order to evaluate the accuracy of the classifier for  
587 values of  $k$  ranging from 1 to 100. Once the accuracy values were obtained, a  $k$  value was chosen  
588 so that it was not lower than 10 or higher than 20% of the total number of ROIs in that region.  
589 This means that we did not necessarily choose the  $k$  values that resulted in the highest accuracy  
590 but used the results to guide our choice of  $k$  to calculate the fraction of neighbors for each  
591 frequency (stacked bar graphs in Figure 4). The  $K$  chosen for each brain region was cerebellum:  
592 20, hindbrain: 27, tectum: 13, ON: 19, TS: 11, telencephalon: 12, tegmentum: 27.

593  
594 Finally, in order to quantify how spatially segregated the frequency-selective ROIs in each brain  
595 region were, a new set of ROIs was generated. The number of labels for each frequency was kept  
596 the same as for the raw data, but they were reassigned to different  $xyz$  coordinates using a  
597 uniform random distribution. The neighbors were then computed using the same  $k$  used in the  
598 real dataset. This was performed multiple times for each frequency with a different number of  
599 ROIs with new random label assignments (10, 50 and a maximum of 100 iterations). This  
600 analysis allowed us to identify how different the spatial distributions of the ROIs were when  
601 compared to the same set of  $xyz$  coordinates, but with frequency labels assigned randomly in  
602 space. The stacked bar graphs in Figure 4B-G show the mean of the neighbor fractions with all  
603 frequencies considered (e.g. the value of 100 Hz neighbors in telencephalon is the mean 100Hz  
604 neighbor fraction of the ROIs of all frequencies). This was done because the mean and standard  
605 deviation of the neighbor fractions across frequencies did not change with frequency. The heat  
606 maps show the ratio of the difference between the fraction of neighbors of each frequency in the

607 raw data and the ROIs with randomized frequency labels which we defined as the neighboring  
608 frequency index (NFI). The NFI is obtained by  $NFI = (n_{real,freq} - n_{random,freq}) /$   
609  $n_{random,freq}$ , where  $n_{real,freq}$  is the neighbor fraction of the experimental data for a certain  
610 frequency and  $n_{real,random}$  the neighbor fraction of the same frequency in a dataset containing  
611 the same numbers of frequency-responsive neurons of each type, but randomly reassigned to the  
612 ROIs in the dataset. The statistical analyses were done to compare the distribution of neighbor  
613 fractions of each ROI in the raw data per frequency and per brain region ( $n$  available in  
614 Supplementary Figure 2G) against the neighbor fractions of the 100 ROIs with random  
615 reassigned labels per frequency and brain region. We used the non-parametric Kruskal-Wallis  
616 test with Dunn's correction for multiple comparisons to obtain the adjusted  $P$ -values.

617 **References**

- 618
- 619 1. Eaton, R.C., and Didomenico, R. (1986). The role of the teleost escape response during  
620 development. *Trans. Am. Fish. Soc.* *115*, 128-142. doi:10.1577/1548-8659
- 621 2. Fay, R.R., and Simmons, A.M. (1999). The Sense of Hearing in Fishes and Amphibians.  
622 In *Comparative Hearing: Fish and Amphibians*, R.R. Fay and A.N. Popper, eds. (New  
623 York, NY: Springer New York), pp. 269-318. doi:10.1007/978-1-4612-0533-3\_7
- 624 3. McKibben, J.R., and Bass, A.H. (1999). Peripheral encoding of behaviorally relevant  
625 acoustic signals in a vocal fish: single tones. *J. Comp. Physiol. A* *184*, 563-576.  
626 doi:10.1007/s003590050356
- 627 4. McKibben, J.R., and Bass, A.H. (2001). Peripheral encoding of behaviorally relevant  
628 acoustic signals in a vocal fish: harmonic and beat stimuli. *J. Comp. Physiol. A* *187*, 271-  
629 285. doi:10.1007/s003590100199
- 630 5. Higgs, D.M., Rollo, A.K., Souza, M.J., and Popper, A.N. (2003). Development of form  
631 and function in peripheral auditory structures of the zebrafish (*Danio rerio*). *J. Acoust.*  
632 *Soc. Am.* *113*, 1145-1154. doi:10.1121/1.1536185
- 633 6. Alderks, P.W., and Sisneros, J.A. (2013). Development of the acoustically evoked  
634 behavioral response in larval plainfin midshipman fish, *Porichthys notatus*. *PLoS One* *8*,  
635 e82182. doi:10.1371/journal.pone.0082182
- 636 7. Bhandiwad, A.A., Zeddies, D.G., Raible, D.W., Rubel, E.W., and Sisneros, J.A. (2013).  
637 Auditory sensitivity of larval zebrafish (*Danio rerio*) measured using a behavioral  
638 prepulse inhibition assay. *J. Exp. Biol.* *216*, 3504-3513. doi:10.1242/jeb.087635
- 639 8. Fay, R.R. (1992). Analytic listening by the goldfish. *Hear. Res.* *59*, 101-107.  
640 doi:10.1016/0378-5955(92)90107-x
- 641 9. Yang, Q., Sun, P., Chen, S., Li, H., and Chen, F. (2017). Behavioral methods for the  
642 functional assessment of hair cells in zebrafish. *Front. Med.* *11*, 178-190.  
643 doi:10.1007/s11684-017-0507-x
- 644 10. Eaton, R.C., Lavender, W.A., and Wieland, C.M. (1981). Identification of Mauthner-  
645 Initiated Response Patterns in Goldfish - Evidence from Simultaneous Cinematography  
646 and Electrophysiology. *J Comp Physiol* *144*, 521-531. doi:10.1007/Bf01326837
- 647 11. Lu, Z., and DeSmidt, A.A. (2013). Early development of hearing in zebrafish. *J Assoc*  
648 *Res Otolaryngol* *14*, 509-521. doi:10.1007/s10162-013-0386-z
- 649 12. Maruska, K.P., and Sisneros, J.A. (2016). Comparison of Electrophysiological Auditory  
650 Measures in Fishes. *Adv Exp Med Biol* *877*, 227-254. doi:10.1007/978-3-319-21059-  
651 9\_11

- 652 13. Sisneros, J.A., and Bass, A.H. (2005). Ontogenetic changes in the response properties of  
653 individual, primary auditory afferents in the vocal plainfin midshipman fish *Porichthys*  
654 *notatus* Girard. *J. Exp. Biol.* *208*, 3121-3131. doi:10.1242/jeb.01742
- 655 14. Wright, K.J., Higgs, D.M., Cato, D.H., and Leis, J.M. (2010). Auditory sensitivity in  
656 settlement-stage larvae of coral reef fishes. *29*, 235-243. doi:10.1007/s00338-009-0572-y
- 657 15. Simmich, J., Staykov, E., and Scott, E. (2012). Zebrafish as an appealing model for  
658 optogenetic studies. *Prog. Brain Res.* *196*, 145-162. doi:10.1016/B978-0-444-59426-  
659 6.00008-2
- 660 16. Vanwalleghem, G.C., Ahrens, M.B., and Scott, E.K. (2018). Integrative whole-brain  
661 neuroscience in larval zebrafish. *Curr Opin Neurobiol* *50*, 136-145.  
662 doi:10.1016/j.conb.2018.02.004
- 663 17. Favre-Bulle, I.A., Vanwalleghem, G., Taylor, M.A., Rubinsztein-Dunlop, H., and Scott,  
664 E.K. (2018). Cellular-Resolution Imaging of Vestibular Processing across the Larval  
665 Zebrafish Brain. *Curr Biol* *28*, 3711-3722 e3713. doi:10.1016/j.cub.2018.09.060
- 666 18. Marquez-Legorreta, E., Constantin, L., Piber, M., Favre-Bulle, I.A., Taylor, M.A.,  
667 Vanwalleghem, G.C., and Scott, E. (2019). Brain-wide visual habituation networks in  
668 wild type and *fmr1* zebrafish. bioRxiv. doi:10.1101/722074
- 669 19. Vanwalleghem, G., Heap, L.A., and Scott, E.K. (2017). A profile of auditory-responsive  
670 neurons in the larval zebrafish brain. *J Comp Neurol* *525*, 3031-3043.  
671 doi:10.1002/cne.24258
- 672 20. Privat, M., Romano, S.A., Pietri, T., Jouary, A., Boulanger-Weill, J., Elbaz, N.,  
673 Duchemin, A., Soares, D., and Sumbre, G. (2019). Sensorimotor Transformations in the  
674 Zebrafish Auditory System. *Curr Biol* *29*, 4010-4023 e4014.  
675 doi:10.1016/j.cub.2019.10.020
- 676 21. Bass, A.H., and McKibben, J.R. (2003). Neural mechanisms and behaviors for acoustic  
677 communication in teleost fish. *Prog. Neurobiol.* *69*, 1-26. doi:10.1016/s0301-  
678 0082(03)00004-2
- 679 22. Maruska, K.P., and Tricas, T.C. (2009). Encoding properties of auditory neurons in the  
680 brain of a soniferous damselfish: response to simple tones and complex conspecific  
681 signals. *J. Comp. Physiol. A Neuroethol. Sens. Neural Behav. Physiol.* *195*, 1071-1088.  
682 doi:10.1007/s00359-009-0480-1
- 683 23. Wysocki, L.E., and Ladich, F. (2003). The representation of conspecific sounds in the  
684 auditory brainstem of teleost fishes. *J. Exp. Biol.* *206*, 2229-2240. doi:10.1242/jeb.00417
- 685 24. Popper, A.N., Hawkins, A.D., Sand, O., and Sisneros, J.A. (2019). Examining the hearing  
686 abilities of fishes. *J. Acoust. Soc. Am.* *146*, 948. doi:10.1121/1.5120185

- 687 25. Zeddies, D.G., and Fay, R.R. (2005). Development of the acoustically evoked behavioral  
688 response in zebrafish to pure tones. *J. Exp. Biol.* *208*, 1363-1372. doi:10.1242/jeb.01534
- 689 26. Higgs, D.M., Souza, M.J., Wilkins, H.R., Presson, J.C., and Popper, A.N. (2002). Age-  
690 and size-related changes in the inner ear and hearing ability of the adult zebrafish (*Danio*  
691 *rerio*). *J Assoc Res Otolaryngol* *3*, 174-184. doi:10.1007/s101620020035
- 692 27. Thompson, A.W., Vanwalleghem, G.C., Heap, L.A., and Scott, E.K. (2016). Functional  
693 Profiles of Visual-, Auditory-, and Water Flow-Responsive Neurons in the Zebrafish  
694 Tectum. *Curr Biol* *26*, 743-754. doi:10.1016/j.cub.2016.01.041
- 695 28. Bang, P.I., Yelick, P.C., Malicki, J.J., and Sewell, W.F. (2002). High-throughput  
696 behavioral screening method for detecting auditory response defects in zebrafish. *J.*  
697 *Neurosci. Methods* *118*, 177-187. doi:10.1016/s0165-0270(02)00118-8
- 698 29. Burgess, H.A., and Granato, M. (2007). Sensorimotor gating in larval zebrafish. *J.*  
699 *Neurosci.* *27*, 4984-4994. doi:10.1523/JNEUROSCI.0615-07.2007
- 700 30. Chen, T.W., Wardill, T.J., Sun, Y., Pulver, S.R., Renninger, S.L., Baohan, A., Schreiter,  
701 E.R., Kerr, R.A., Orger, M.B., Jayaraman, V., et al. (2013). Ultrasensitive fluorescent  
702 proteins for imaging neuronal activity. *Nature* *499*, 295-300. doi:10.1038/nature12354
- 703 31. Taylor, M.A., Vanwalleghem, G.C., Favre-Bulle, I.A., and Scott, E.K. (2018). Diffuse  
704 light-sheet microscopy for stripe-free calcium imaging of neural populations. *J*  
705 *Biophotonics* *11*, e201800088. doi:10.1002/jbio.201800088
- 706 32. Vanwalleghem, G., Schuster, K., Taylor, M.A., Favre-Bulle, I.A., and Scott, E.K. (2020).  
707 Brain-Wide Mapping of Water Flow Perception in Zebrafish. *J. Neurosci.* *40*, 4130-4144.  
708 doi:10.1523/JNEUROSCI.0049-20.2020
- 709 33. Randlett, O., Wee, C.L., Naumann, E.A., Nnaemeka, O., Schoppik, D., Fitzgerald, J.E.,  
710 Portugues, R., Lacoste, A.M., Riegler, C., Engert, F., et al. (2015). Whole-brain activity  
711 mapping onto a zebrafish brain atlas. *Nat. Methods* *12*, 1039-1046.  
712 doi:10.1038/nmeth.3581
- 713 34. Bae, Y.K., Kani, S., Shimizu, T., Tanabe, K., Nojima, H., Kimura, Y., Higashijima, S.,  
714 and Hibi, M. (2009). Anatomy of zebrafish cerebellum and screen for mutations affecting  
715 its development. *Dev. Biol.* *330*, 406-426. doi:10.1016/j.ydbio.2009.04.013
- 716 35. Constantin, L., Poulsen, R.E., Favre-Bulle, I.A., Taylor, M.A., Sun, B., Goodhill, G.J.,  
717 Vanwalleghem, G.C., and Scott, E.K. (2020). Altered brain-wide auditory networks in  
718 *fmr1*-mutant larval zebrafish. *BMC Biol.* *18* (125), 1-17. doi:10.1186/s12915-020-00857-  
719 6
- 720 36. Liao, J.C., and Haehnel, M. (2012). Physiology of afferent neurons in larval zebrafish  
721 provides a functional framework for lateral line somatotopy. *J Neurophysiol* *107*, 2615-  
722 2623. doi:10.1152/jn.01108.2011

- 723 37. Tomchik, S.M., and Lu, Z. (2006). Auditory physiology and anatomy of octavolateral  
724 efferent neurons in a teleost fish. *J. Comp. Physiol. A Neuroethol. Sens. Neural Behav.*  
725 *Physiol.* *192*, 51-67. doi:10.1007/s00359-005-0050-0
- 726 38. Echterler, S.M. (1985). Organization of central auditory pathways in a teleost  
727 fish, *Cyprinus carpio*. *Journal of Comparative Physiology A* *156*, 267-280.  
728 doi:10.1007/bf00610868
- 729 39. Edds-Walton, P.L., and Fay, R.R. (2008). Directional and frequency response  
730 characteristics in the descending octaval nucleus of the toadfish (*Opsanus tau*). *J. Comp.*  
731 *Physiol. A Neuroethol. Sens. Neural Behav. Physiol.* *194*, 1013-1029.  
732 doi:10.1007/s00359-008-0373-8
- 733 40. Vanwalleghem, G.C., Scott, E.C., and Constantin, L. (2020). Calcium imaging and the  
734 curse of negativity. *bioRxiv*. doi:10.1101/2020.09.15.298885
- 735 41. Fay, R.R. (1995). Perception of spectrally and temporally complex sounds by the goldfish  
736 (*Carassius auratus*). *Hear. Res.* *89*, 146-154. doi:10.1016/0378-5955(95)00132-8
- 737 42. Smith, M.E., Schuck, J.B., Gilley, R.R., and Rogers, B.D. (2011). Structural and  
738 functional effects of acoustic exposure in goldfish: evidence for tonotopy in the teleost  
739 saccule. *BMC Neurosci.* *12*, 19. doi:10.1186/1471-2202-12-19
- 740 43. Cervi, A.L., Poling, K.R., and Higgs, D.M. (2012). Behavioral measure of frequency  
741 detection and discrimination in the zebrafish, *Danio rerio*. *Zebrafish* *9*, 1-7.  
742 doi:10.1089/zeb.2011.0720
- 743 44. Mann, Z.F., and Kelley, M.W. (2011). Development of tonotopy in the auditory  
744 periphery. *Hear. Res.* *276*, 2-15. doi:10.1016/j.heares.2011.01.011
- 745 45. Hackett, T.A., Barkat, T.R., O'Brien, B.M., Hensch, T.K., and Polley, D.B. (2011).  
746 Linking topography to tonotopy in the mouse auditory thalamocortical circuit. *J.*  
747 *Neurosci.* *31*, 2983-2995. doi:10.1523/JNEUROSCI.5333-10.2011
- 748 46. Humphries, C., Liebenthal, E., and Binder, J.R. (2010). Tonotopic organization of human  
749 auditory cortex. *Neuroimage* *50*, 1202-1211. doi:10.1016/j.neuroimage.2010.01.046
- 750 47. Maximino, C., Lima, M.G., Oliveira, K.R., Batista Ede, J., and Herculano, A.M. (2013).  
751 "Limbic associative" and "autonomic" amygdala in teleosts: a review of the evidence. *J.*  
752 *Chem. Neuroanat.* *48-49*, 1-13. doi:10.1016/j.jchemneu.2012.10.001
- 753 48. von Trotha, J.W., Vernier, P., and Bally-Cuif, L. (2014). Emotions and motivated  
754 behavior converge on an amygdala-like structure in the zebrafish. *Eur. J. Neurosci.* *40*,  
755 3302-3315. doi:10.1111/ejn.12692
- 756 49. Ganz, J., Kroehne, V., Freudenreich, D., Machate, A., Geffarth, M., Braasch, I., Kaslin,  
757 J., and Brand, M. (2014). Subdivisions of the adult zebrafish pallium based on molecular  
758 marker analysis. *F1000Res* *3*, 308. doi:10.12688/f1000research.5595.2

- 759 50. Mueller, T., Dong, Z., Berberoglu, M.A., and Guo, S. (2011). The dorsal pallium in  
760 zebrafish, *Danio rerio* (Cyprinidae, Teleostei). *Brain Res* 1381, 95-105.  
761 doi:10.1016/j.brainres.2010.12.089
- 762 51. Cant, N.B., and Benson, C.G. (2003). Parallel auditory pathways: projection patterns of  
763 the different neuronal populations in the dorsal and ventral cochlear nuclei. *Brain Res.*  
764 *Bull.* 60, 457-474. doi:10.1016/s0361-9230(03)00050-9
- 765 52. Wickesberg, R.E., and Oertel, D. (1988). Tonotopic projection from the dorsal to the  
766 anteroventral cochlear nucleus of mice. *J. Comp. Neurol.* 268, 389-399.  
767 doi:10.1002/cne.902680308
- 768 53. Andersen, R.A., and Enger, P.S. (1968). Microphonic potentials from the sacculus of a  
769 teleost fish. *Comp. Biochem. Physiol.* 27, 879-881. doi:10.1016/0010-406x(68)90630-0
- 770 54. Wubbels, R., and Schellart, N. (1998). An analysis of the relationship between the  
771 response characteristics and topography of directional- and non-directional auditory  
772 neurons in the torus semicircularis of the rainbow trout. *The Journal of Experimental*  
773 *Biology* 201, 1947-1958. doi:10.1.1.996.6480
- 774 55. Panier, T., Romano, S.A., Olive, R., Pietri, T., Sumbre, G., Candelier, R., and Debregeas,  
775 G. (2013). Fast functional imaging of multiple brain regions in intact zebrafish larvae  
776 using selective plane illumination microscopy. *Front Neural Circuits* 7, 65.  
777 doi:10.3389/fncir.2013.00065
- 778 56. Edelstein, A., Amodaj, N., Hoover, K., Vale, R., and Stuurman, N. (2010). Computer  
779 control of microscopes using microManager. *Curr. Protoc. Mol. Biol.* *Chapter 14*, Unit14  
780 20. doi:10.1002/0471142727.mb1420s92
- 781 57. Pnevmatikakis, E.A., and Giovannucci, A. (2017). NoRMCorre: An online algorithm for  
782 piecewise rigid motion correction of calcium imaging data. *J. Neurosci. Methods* 291, 83-  
783 94. doi:10.1016/j.jneumeth.2017.07.031
- 784 58. Avants, B.B., Epstein, C.L., Grossman, M., and Gee, J.C. (2008). Symmetric  
785 diffeomorphic image registration with cross-correlation: evaluating automated labeling of  
786 elderly and neurodegenerative brain. *Med. Image Anal.* 12, 26-41.  
787 doi:10.1016/j.media.2007.06.004  
788
